# Supplementary material
Source: PubMed Central journal article supplement (PMC7064777)
Supplement: mBio.03223-19-st001.pdf [file mBio.03223-19-st001.pdf]

**Table S1. Growth rates ( $\mu$ ) with its standard deviation (STDV) measured for MG1655 and ppGpp<sup>0</sup> strain in different media.**

|                          | Medium <sup>a</sup>                                              | $\mu$ (h <sup>-1</sup> ) | STDV  |
|--------------------------|------------------------------------------------------------------|--------------------------|-------|
| <b>MG1655</b>            | LB                                                               | 2.30                     | 0.013 |
|                          | Medium A + glucose 0.2% + 19 AA <sub>40</sub> + S <sub>400</sub> | 1.40                     | 0.001 |
|                          | M9 + glucose 0.2% + 19 AA <sub>40</sub> + S <sub>400</sub>       | 1.58                     | 0.005 |
|                          | M9 + glucose 0.2% + $\Sigma$ set + (GNQY) <sub>40</sub>          | 0.97                     | 0.036 |
|                          | M9 + glucose 0.2% + $\Sigma$ set                                 | 0.83                     | 0.005 |
|                          | M9 + glucose 0.2%                                                | 0.64                     | 0.036 |
|                          | M9 + succinate 0.4%                                              | 0.52                     | 0.012 |
| <b>ppGpp<sup>0</sup></b> | LB                                                               | 1.94                     | 0.004 |
|                          | Medium A + glucose 0.2% + 19AA <sub>40</sub> + S <sub>400</sub>  | 1.38                     | 0.029 |
|                          | M9 + glucose 0.2% + 19AA <sub>40</sub> + S <sub>400</sub>        | 1.80                     | 0.066 |
|                          | M9 + glucose 0.2% + $\Sigma$ set + (GNQY) <sub>40</sub>          | 1.08                     | 0.028 |
|                          | M9 + glucose 0.2% + $\Sigma$ set                                 | 0.47                     | 0.067 |

<sup>a</sup>  $\Sigma$  set = (DEFHILTV)<sub>40</sub> + S<sub>400</sub>. Subscript numbers indicate concentration used ( $\mu\text{g/ml}$ ). 19 AA = all amino acids except serine.
